# Supplementary material for: Evaluation of lot-to-lot repeatability and effect of assay media choice in the recombinant Factor C assay
Source: Royal Society of Chemistry journal article supplement (doi:10.1039/c1em10035a), 2011-01-01
Supplement: c1em10035a.pdf [file c1em10035a.pdf]

|                            | <b>C<sub>10:0</sub></b> | <b>C<sub>12:0</sub></b> | <b>Total</b><br><b>C<sub>10:0</sub>+ C<sub>12:0</sub>+<br/>C<sub>14:0</sub></b> |
|----------------------------|-------------------------|-------------------------|---------------------------------------------------------------------------------|
| <b>LAL (EU/mg)</b>         | <b>0.80</b>             | <b>0.88</b>             | <b>0.92</b>                                                                     |
| <b>rFC - Tris (EU/mg)</b>  | <b>0.77</b>             | <b>0.82</b>             | <b>0.90</b>                                                                     |
| <b>rFC - Water (EU/mg)</b> | <b>0.76</b>             | <b>0.80</b>             | <b>0.88</b>                                                                     |
| <b>rFC - TAP (EU/mg)</b>   | <b>0.79</b>             | <b>0.81</b>             | <b>0.91</b>                                                                     |
| <b>rFC - Tween (EU/mg)</b> | <b>0.76</b>             | <b>0.86</b>             | <b>0.90</b>                                                                     |

**Supplemental Table 1: Summary of Spearman correlation values for LAL and rFC endotoxin estimates (EU/mg) with mid-chain 3-hydroxy-fatty acids (pmol/mg).** Mean endotoxin estimates (EU/mg) for dust samples (n=60) assayed by three rFC assay kit lots in water, Tris buffer, TAP buffer or Tween buffer or by LAL in TAP buffer were correlated with amounts of C<sub>10:0</sub>, C<sub>12:0</sub>, and total C<sub>10:0</sub>+ C<sub>12:0</sub>+ C<sub>14:0</sub> 3-hydroxy-fatty acids (pmol/mg) as determined by GC-MS. All Spearman correlation values were significant (p < 0.001).
